# Supplementary material for: In and Out of Self-Employment, Are You Really an Entrepreneur: The Rise of a New Division?
Source: publisher site journal article supplement (doi:10.1515/erj-2019-0373), 2021-06-29
Supplement: Supplementary file 1 [file j_erj-2019-0373_suppl_001.docx]

Online Appendix

Table 1 below reports the number of individual observations for each wave for the combined BHPS and UKHLS sample, showing the number of Original Sample Members (OSMs), Permanent Sample Members (PSMs) and Temporary Sample Members (TSMs) from wave 1 to 18 (years 1991 till 2008) using the BHPS, and wave 20 to 24 (years 2010 till 2014) using the UKHLS, with missing data for wave 19 (year 2009). As shown in the table, the number of OSMs who we follow over the years (23 waves) decreases in the UKHLS sample, from 10,264 respondents in year 1991 to 7,650 in 2014. This is due to many dropping out of the survey and not wanting to continue in the UKHLS.

Table 1: Number of Individual Observation in each wave of the BHPS & UKHLS

| BHPS | Year | OSMs | PSMs | TSMs | Total |
| --- | --- | --- | --- | --- | --- |
| wave 1 | 1991 | 10,264 | 0 | 0 | 10,264 |
| wave 2 | 1992 | 8,734 | 10 | 443 | 9,187 |
| wave 3 | 1993 | 8,318 | 28 | 596 | 8,942 |
| wave 4 | 1994 | 8,033 | 76 | 739 | 8,848 |
| wave 5 | 1995 | 7,714 | 116 | 767 | 8,597 |
| wave 6 | 1996 | 7,711 | 170 | 886 | 8,767 |
| wave 7 | 1997 | 9,054 | 229 | 998 | 10,281 |
| wave 8 | 1998 | 8,767 | 279 | 964 | 10,010 |
| wave 9 | 1999 | 13,215 | 346 | 964 | 14,525 |
| wave 10 | 2000 | 12,915 | 342 | 964 | 14,221 |
| wave 11 | 2001 | 15,618 | 328 | 1,439 | 17,385 |
| wave 12 | 2002 | 13,536 | 301 | 1,366 | 15,203 |
| wave 13 | 2003 | 12,974 | 289 | 1,421 | 14,684 |
| wave 14 | 2004 | 12,492 | 280 | 1,493 | 14,265 |
| wave 15 | 2005 | 12,097 | 272 | 1,615 | 13,984 |
| wave 16 | 2006 | 11,799 | 263 | 1,700 | 13,762 |
| wave 17 | 2007 | 11,319 | 259 | 1,699 | 13,277 |
| wave 18 | 2008 | 10,729 | 253 | 1,488 | 12,470 |
| UKHLS |  |  |  |  |  |
| wave 20 | 2010 | 10,012 | 760 | 1,008 | 11,780 |
| wave 21 | 2011 | 9,368 | 714 | 885 | 10,967 |
| wave 22 | 2012 | 8,654 | 668 | 770 | 10,092 |
| wave 23 | 2013 | 8,185 | 630 | 731 | 9,546 |
| wave 24 | 2014 | 7,650 | 577 | 642 | 8,869 |
|  |  |  |  |  |  |
| Total |  | 239,158 | 7,190 | 23,578 | 269,926 |

Table 2 below represents the transition matrices of our working sample and shows the average movement rates from years 1991 till 2014, by gender, between five distinct labour markets states in the combined BHPS and UKHLS datasets. The five labour market states considered in the analysis are: self-employment, employment, unemployment, retirement and inactive status. The self-employed are respondents who declare their main labour market activity in self-employment. The same consideration goes for those who classify themselves as paid employees. The unemployed are individuals who are not currently working but are available and searching for work. The retired are workers who previously retired from employment at either young or late age. The economically inactive are either still in full time education, women on maternity leave, long-term sick, or individuals on government training-schemes.

Table 2: Average Year to Year Transition Matrix by genders (BHPS 1991-2008 & UKHLS 2010-2014), Average Row Percentages.

|  | *Labour market status in year 2014* | | | | |  |
| --- | --- | --- | --- | --- | --- | --- |
| *Labour market status in year 1991* | Self-employed | Employees | Unemployed | Retired | Inactive | Total Observations |
|  |  |  |  |  |  |  |
| *Men* |  |  |  |  |  |  |
| Self-employed | 82.71% | 12.21% | 1.76% | 2.23% | 1.10% | 12,117 |
| Employees | 2.93% | 91.61% | 2.44% | 1.72% | 1.31% | 56,683 |
| Unemployed | 5.90% | 29.46% | 47.17% | 4.56% | 12.91% | 5,088 |
| Retired | 0.45% | 1.23% | 0.37% | 96.15% | 1.80% | 21,220 |
| Inactive | 1.25% | 13.55% | 7.46% | 6.36% | 71.38% | 10,515 |
| Total observations | 12,208 | 56,590 | 4,859 | 22,548 | 9,418 | 105,623 |
|  |  |  |  |  |  |  |
| *Women* |  |  |  |  |  |  |
| Self-employed | 74.19% | 16.02% | 1.37% | 2.72% | 5.71% | 4,673 |
| Employees | 1.45% | 89.64% | 1.56% | 1.88% | 5.48% | 60,646 |
| Unemployed | 1.98% | 32.82% | 28.00% | 3.58% | 33.62% | 3,132 |
| Retired | 0.17% | 0.85% | 0.14% | 93.45% | 5.40% | 29,212 |
| Inactive | 1.19% | 15.15% | 3.90% | 7.73% | 72.03% | 28,956 |
| Total observations | 4,807 | 60,805 | 3,058 | 30,924 | 27,086 | 126,619 |
|  |  |  |  |  |  |  |

Tables 3.A-B-C and D report the full descriptive statistics for general group of workers and tables 4.A-B-C and D for our division.

##### Individual Characteristics

###### Gender

Our results show that the self-employed in general have a higher male presence than female workers (75.91% of self-employed workers are men, compared to 24.14% are women). Similarly, for both subgroups of self-employed; the sustained and the dabbled self-employed, the percentage of male workers is dominant (80.83% male compared to only 19.17% female workers identified as sustained self-employed, and 68.45% compared to 31.55% female workers are identified as dabbled self-employed). Whereas, a higher proportion of female participation is recorded in wage employment, (51.40% are women in table 3.A), and almost an equal proportion for the always employees (49.06% in table 4.A), with the differences between all groups (self-employed versus employees, sustainers versus dabblers, sustainers versus always employees, and dabblers versus always employees) statistically significant with p-values less than 0.05 for the Pearson chi-squared test at the right-hand side of both tables.

###### Ethnicity, Origin and Language

Our results show that most our workers (more than 95%) are from a white ethnic background and this is demonstrated in both tables. But the self-employed in general, and the dabbled and sustained self-employed report a higher percentage of workers from non-white ethnic backgrounds (2.92% in table 3.A, 3.25% and 2.77%in table 4.A, respectively) than the general group of employees and always employees (2.53% in table 3.A and 2.09 % in table 4.A). The differences between our group of self-employed workers and wage earners are statistically significant; however, between the sustainers and dabblers we could not depict any significant difference for workers from non-white ethnic backgrounds (Pearson chi-squared test p-values equal to 0.9).

Similarly, most of our respondents are UK-born (93%) and consider English to be their first language (78%). The self-employed in general and both subgroups of self-employed report a higher percentage of non-UK born workers (6.16% in table 3.A, 6.18% of sustainers and 5.51% of dabblers in table 4.A), than the paid workers (4.69%) and the always employees (4.27%), with differences between groups (except between sustainers and dabblers) are significant

Only the general group of self-employed and sustained self-employed report higher percentages for non-English language than paid workers (3.9% for the general self-employed, and 5% for the sustained self-employed), and the differences between groups are statistically significant. Whereas, the dabbled self-employed have similar percentages to the general employees and the always employees. So far, the statistics reveal that the minority groups are less advantaged in the labour market and are less likely to be found in paid employment than self-employment.

###### Age

In our study, the age group variable is divided into five age subcategories, with respondents’ ages ranging from 16 to 24, 25 to 39, 40 to 49, 50 to 64 and 65 and over. The intuition behind dividing the age band is to observe the percentage of workers allocated between young, middle aged and oldest groups in the labour market. It is noticeable that the youngest category of workers (age 16 to 24) are lastly allocated among the self-employed (2.76%) and the sustained self-employed (2.94%), compared to our group of paid workers (9.98%for the general group of paid workers and 10.76% for the always employees) and the differences are statistically significant between groups This is conceivable as they necessarily have fewer observations and thus less scope for being observed in self-employment. Whereas, the first cohort of the middle-aged subcategory (age 25 to 39) are the highest among the general employees (40.58%) and the dabbled self-employed (47.94%), and the differences among groups are statistically significant. The second cohort (age 40 to 49) are the highest among the general self-employed (29.92%), and the always employees (45.09%). The older subgroup of workers (age between 50 and 64) are the highest among the general group of self-employed (31.51%), the always employees (28.34%), followed by the sustained self-employed (27.30%), and lastly by the dabbled self-employed (13.68%). For respondents aged 65 and over they are higher in general self-employment than paid employment (3.67%compared to 1.31% in Table 3.A). Oppositely, we find that the highest percentage for workers age 65 and over are the always employees (15.24%), and the lowest for the dabbled self-employed (0.38%), but the differences among these last two are insignificant (Pearson chi-squared p-values equal to 0.467). Also, very few of our sustainers (2.41%) are aged 65 and over. The higher percentage in paid employment for the elderly group of workers can be explained by the phasing out of the retirement age of 65 and the enforcement of the Equality Act for ageism in 2010. The BHPS dataset for the years 1991 till 2008 could not depict that influence; however, its successor the UKHLS for the years 2010 to 2014 outweighs this drawback (gov.uk, 2014; McFall, 2013; D’Arcy and Gardiner, 2014).

What has been shown here is that the general group of self-employed workers are older than the employees in our sample, conforming also with British statistics (D’Arcy and Gardiner, 2014; ONS, 2014), because business start-ups demand more physical and human capital accumulation from individuals, transmitted by the knowledge and abilities gained over time through life and work experience (Taylor, 2004; Meager, 2007; Dawson *et al*., 2009). But, when comparing the findings with our division of workers, the results do not match, where the always employees are shown to be older than both subgroups of self-employed, and the dabbled self-employed are the youngest among our division. This is because the always employees are the categorised group of paid workers who we observe more than one-third of the time in paid employment only, hence they are lower in numbers and older than the general/amalgamated group of employees that do not follow this set of criteria. Whereas, for dabblers, we do not see them fully committing to either paid or self-employment jobs.

###### Health status and disability

Our results show, that respondents reporting good health conditions are the highest among the general group of self-employed (79.21%) and for both subgroups of self-employed (80.64% of sustainers and 79.98% of dabblers) in comparison to paid employees (76.88%) and the always employees (78.78%). However, the differences between the amalgamated group of self-employed and paid workers are insignificant, whereas among our division of workers the Pearson chi-squared p-values are highly significant. This is also confirmed by the lower prevalence of workers who consider themselves as disabled in general self-employment (3.90%) and in both a sustained (3.16%) and dabbling manner (3.93%), compared with general paid employment (4.75%) and always in wage employment (4.44 %), all yielding significant values for the differences.

###### Educational and Vocational Qualifications

The education level here is set across five levels of attainments; higher degree, A-levels, GCSE, other qualifications and no qualification. Also, an additional dummy variable is included to indicate if workers have any vocational qualifications. In general, the paid workers have a significantly higher percentage for degree achievement compared to the general group of self-employed workers (45.26% for higher degree compared with 43.09%of self-employed workers with higher degree, in table 3.A), where the latter report higher percentages for not holding any qualifications (15.88% of self-employed compared to 13.38% of paid workers), with both differences highly significant at 99% confidence level. Looking at our division, the percentages differ, where dabblers have the highest percentage of higher degree achievement (52.57%, compared to 42.61%for sustainers, and 45.97% for the always employees, in table 4.A), and lowest in reporting not having any qualifications (9.16%, compared to 15.21% for sustainers and 11.06% for the always employees), with both differences significant. A-levels, other qualifications and no qualifications are significantly higher among the sustained self-employed and GCSEs levels among the always employees. As for having vocational qualifications (the skills acquired by the National Occupation Standard), the percentages are equally shared, among our three groups of workers (at 44%).

##### Work Characteristics

###### Industry level

Worker’s occupation and industry concentration provides an indication of the skill levels each possess (highly skilled, medium skilled or low skilled). For this reason, we convert the industry variable, based on the 2010 Standard Industry Classifications into skills levels (available in table 3.B for the general group of self-employed and 4.B for our division of workers). The highly skilled workers consist of managers, senior officials, professional occupations, associate professionals and technical. The medium skilled are the administration and secretarial work, skilled trades, care, leisure and other services, and the low skilled are workers in sales and customer services, in process, plant and machine operatives, and in elementary occupations.

The results in table 3.B show that our general group of self-employed have a significantly higher percentage in high skilled industry than employees (43.73%compared to 33.03%), where these latter have significantly higher percentage in medium skilled industry (36.01% of paid employees versus 33.01% of self-employed workers) and low skilled work (22.73% of paid employees versus 14.86% of self-employed). Similarly, in table 4.B the percentages in highly skilled jobs are significantly higher for both subgroups of self-employed than the always employees, with dabblers having the highest percentages in highly skilled occupation (44.30% for dabblers, compared to 42.51% for sustainers and 32.99% for always employees). Whereas, the always employees predominate the medium (36.49%) and low skilled (21.40%) industries. This confirm with the findings mentioned in the Eurostat (2014a) statistics in 2013, where the largest occupational group for the self-employed in the UK is professional (24%), followed by craft and related products (22%).

###### Employ Staff

Looking at the general group of self-employed in our data, only 30.55% employ staff to work. This is also evident for our sustainers with 30.45% of them employing staff, whereas for our dabblers, only 4% are self-employed with employees. We further look at the nature of work in self-employment and find that the highest percentage of self-employed in our study report that they work for self-employed members (40.72%), or own business (33.07%) and just a very few own and work at the same time (1.89%). This is also evident for both subgroups of self-employed and the differences for the Pearson chi-squared test are all significant; but we do not rely much on this variable as the percentage of missing responses are very high.

###### Second Jobs and Work satisfaction

In our sample, the percentage of workers with second paid jobs is significantly higher among the general group of paid workers than with the self-employed (22.79 % compared to 9.58%). But the results do not match with the summary statistics found in table 4.B for our division of workers. The always employees report the lowest percentages in having second paid jobs (7.90%), whereas dabblers have the highest percentages (12.91%).

Looking at work satisfaction, the self-employed in general report higher work satisfaction than paid workers (87.185 compared to 81.99%). This is also evident for our sustainers (87.65%), whereas dabblers and always employees report the same levels of satisfaction (82%).

##### Household Characteristics

###### Marriage, spouse employment, children, dependence and care

The housing structure plays an important role in determining how self-employment is viewed. Marriage or cohabiting is significantly more prevalent for the self-employed (82.29%), and for our group of sustainers (81.45%) and dabblers (79.54%), but the employees report a significantly higher percentage for working spouses or partners (62.99% compared to 61.30% for self-employed workers), whereas in our division the dabblers have the highest percentage (65.82%), followed by the always employees (64.79%) and lastly by the sustainers (61.85%). The self-employed in general and the sustained and dabbled self-employed report a significantly higher percentage in having children, however the general paid workers and always employees report a significantly higher percentage in having dependent children under the age of 16 and taking care of other household members.

###### House Tenure

The housing tenure is very informative on the owner’s physical capital and wealth. The house ownership outright is the highest among the self-employed in general (24.83%), and for the sustained self-employed (23.04%), with all differences between groups significant, hence suggesting that these latter are better off than wage earners and dabblers with respect to home ownership. Whereas ownership with mortgage and renting is significantly higher among the paid workers (65.86% and 19.47%, respectively), reflecting stricter financial commitments than the self-employed. This is also evident for the dabbled self-employed with owning with mortgages (74.9050 and the always employees with renting properties (18.48%), with all differences significant.

##### Parental Background

###### Fathers and Mothers Self-employed

Looking at parents’ background information in table 3.D, our findings show that the self-employed in general report significant higher percentages than paid workers of having previously working fathers and mothers as self-employed (24.77% self-employed fathers and 7.25% self-employed mothers for the self-employed). This is also evident for our group of sustainers, but the percentages gradually decrease for the dabbled self-employed and are significantly the lowest for the always employees.

###### Fathers’ and Mothers’ Educational Qualifications

Finally, looking at parents’ previous educational background, the self-employed have significantly higher percentages for fathers and mothers with university degrees. This is also the case for sustained self-employed fathers and dabbled self-employed mothers. Both variables on parental educational status suffer from high percentages in missing responses, thus we restrain from using these two variables.

#### Correlation and Significance

The Variance Inflation Factors (VIF) method is used to measure the increased variances of the independent parameters caused by the complex design of weighted, clustered and stratified survey estimates (Liao and Valliant, 2012). A value of VIF exceeding 10 is a sign of serious multicollinearity requiring correction by removing the violating predictors from the model.

The VIF values for the explanatory variable shown in the summary statistics tables do not show any concern of larger inflated variances between coefficients. They are lower than 6 and on average less than 2, except for the variables explaining the nature of self-employment and indicating if the self-employed employ workers. For this reason, we decided to exclude these two variables from the analysis and are unable to check the nature of work in self-employment, whether the self-employed employ workers or not. The Pearson 𝜒2–test statistics have significant association between all categorical variables used and the dependent outcome. This provides further validation on the use of these particular variable in our analysis.

Table 3.A: Descriptive statistics (Employees and self-employed)

|  | Employees  (15,285 respondents) |  | Self-employed  (2,601 respondents) |  | VIF | | Pearson X2 test | | --- | |
| --- | --- | --- | --- | --- | --- | --- | --- |
| Variables | Percentages |  | Percentages |  |  | self-employed vs  employees  p-val. |
| *Individual Characteristics* |  |  |  |  |  |  |
| *Gender* |  |  |  |  | 1.60 |  |
| Male | 48.60% |  | 75.91% |  |  | 0.000 |
| Female | 51.40% |  | 24.14% |  |  | 0.000 |
| *missing* | 0.00% |  | 0.00% |  |  |  |
| *Ethnicity* |  |  |  |  | 5.09 |  |
| White | 97.31% |  | 97.03% |  |  | 0.000 |
| Non-White | 2.53% |  | 2.92% |  |  | 0.000 |
| *missing* | 0.16% |  | 0.05% |  |  | 0.220 |
| *Country of Origin* |  |  |  |  | 4.97 |  |
| UK | 95.31% |  | 93.84% |  |  | 0.000 |
| Non-UK | 4.69% |  | 6.16% |  |  | 0.000 |
| *missing* | 0.00% |  | 0.00% |  |  |  |
| *Language* |  |  |  |  | 1.36 |  |
| English | 84.72% |  | 83.08% |  |  | 0.000 |
| Non-English | 2.30% |  | 3.91% |  |  | 0.000 |
| *missing* | 12.98% |  | 13.01% |  |  | 0.001 |
| *Age* |  |  |  |  | 1.34 |  |
| 16-24 | 9.98% |  | 2.76% |  |  | 0.000 |
| 25-39 | 40.58% |  | 32.14% |  |  | 0.000 |
| 40-49 | 26.63% |  | 29.92% |  |  | 0.000 |
| 50-64 | 21.50% |  | 31.51% |  |  | 0.000 |
| 65+ | 1.31% |  | 3.67% |  |  | 0.000 |
| *missing* | 0.00% |  | 0.00% |  |  |  |
| *Health status* |  |  |  |  | 1.16 |  |
| Good | 76.88% |  | 79.24% |  |  | 0.232 |
| Fair | 17.94% |  | 16.65% |  |  | 0.058 |
| Poor | 4.96% |  | 3.99% |  |  | 0.003 |
| *missing* | 0.22% |  | 0.12% |  |  | 0.000 |
| *Disable* |  |  |  |  | 1.03 |  |
| Yes | 4.75% |  | 3.90% |  |  | 0.000 |
| No | 95.34% |  | 96.09% |  |  | 0.000 |
| *missing* | 0.01% |  | 0.01% |  |  | 0.047 |
| *Educational Qualifications* |  |  |  |  | 4.25 |  |
| Higher degree | 45.26% |  | 43.09% |  |  | 0.000 |
| A-levels | 12.09% |  | 12.28% |  |  | 0.952 |
| GCSEs | 20.37% |  | 19.61% |  |  | 0.088 |
| Other qualifications | 8.04% |  | 8.82% |  |  | 0.072 |
| None | 13.38% |  | 15.88% |  |  | 0.000 |
| *missing* | 0.86% |  | 0.31% |  |  | 0.000 |
| Vocational Qualifications |  |  |  |  | 1.62 |  |
| Yes | 42.21% |  | 43.24% |  |  | 0.004 |
| No | 56.44% |  | 56.10% |  |  | 0.000 |
| missing | 1.35% |  | 0.67% |  |  | 0.000 |

Table 3.B: Descriptive statistics (Employees and self-employed)

|  | Employees  (15,285 respondents) |  | Self-employed (2,601 respondents) |  | VIF | | Pearson X2 test | | --- | |
| --- | --- | --- | --- | --- | --- | --- | --- |
| Variables | Percentages |  | Percentages |  |  | self-employed vs employees  p-val. |
| *Work Nature* |  |  |  |  |  |  |
| *Industry Levels* |  |  |  |  | 1.10 |  |
| High skilled | 33.03% |  | 43.73% |  |  | 0.000 |
| Medium skilled | 36.81% |  | 33.01% |  |  | 0.000 |
| Low skilled | 22.73% |  | 14.86% |  |  | 0.000 |
| *missing* | 7.43% |  | 8.40% |  |  | 0.000 |
| *Employ staff* |  |  |  |  | 23.82 |  |
| Yes | 0.00% |  | 30.55% |  |  | 0.000 |
| No | 0.00% |  | 69.16% |  |  | 0.000 |
| *missing* | 100.00% |  | 0.29% |  |  | 0.000 |
| *nature of self-employment* |  |  |  |  | 23.61 |  |
| Own business | 0.00% |  | 33.07% |  |  | 0.000 |
| Partner in a business | 0.00% |  | 11.65% |  |  | 0.000 |
| Work for self-employed | 0.00% |  | 40.72% |  |  | 0.000 |
| Both own and work | 0.00% |  | 1.89% |  |  | 0.000 |
| Subcontractor | 0.00% |  | 6.15% |  |  | 0.000 |
| Freelancer | 0.00% |  | 4.43% |  |  | 0.000 |
| Other | 0.00% |  | 2.04% |  |  | 0.000 |
| *missing* | 100.00% |  | 0.05% |  |  | 0.000 |
| *Second paid job* |  |  |  |  | 6.35 |  |
| Yes | 27.79% |  | 9.58% |  |  | 0.000 |
| No | 72.14% |  | 90.33% |  |  | 0.000 |
| *missing* | 0.07% |  | 0.09% |  |  | 0.000 |
| *Work satisfaction* |  |  |  |  | 2.15 |  |
| dissatisfied | 10.52% |  | 6.68% |  |  | 0.000 |
| neither | 7.49% |  | 5.92% |  |  | 0.000 |
| satisfied | 81.99% |  | 87.18% |  |  | 0.447 |
| *missing* | 0.09% |  | 0.22% |  |  | 0.000 |
| *Total waves in unemployment and/or inactivity* |  |  |  |  | 1.17 |  |
| 0 | 49.12% |  | 57.85% |  |  | 0.000 |
| 1 | 14.27% |  | 11.67% |  |  | 0.000 |
| 2 | 7.98% |  | 6.72% |  |  | 0.000 |
| 3-8 | 19.27% |  | 14.49% |  |  | 0.000 |
| 8+ | 9.36% |  | 9.26% |  |  | 0.197 |

Table 3.C: Descriptive statistics (Employees and self-employed)

|  | Employees  (15,285 respondents) |  | Self-employed (2,601 respondents) |  | VIF | | Pearson X2 test | | --- | |
| --- | --- | --- | --- | --- | --- | --- | --- |
| Variables | Percentages |  | Percentages |  |  | self-employed vs employees  p-val. |
| *Household Characteristics* |  |  |  |  |  |  |
| *Married /Cohabitating* |  |  |  |  | 2.18 |  |
| Yes | 74.77% |  | 82.29% |  |  | 0.000 |
| No | 25.19% |  | 17.49% |  |  | 0.000 |
| *missing* | 0.04% |  | 0.22% |  |  | 0.000 |
| *Spouse/Partner employed* |  |  |  |  | 1.76 |  |
| Yes | 62.99% |  | 61.30% |  |  | 0.000 |
| No | 12.14% |  | 21.27% |  |  | 0.000 |
| *missing* | 24.93% |  | 17.40% |  |  | 0.000 |
| *Has Children* |  |  |  |  | 2.26 |  |
| Yes | 38.90% |  | 41.13% |  |  | 0.000 |
| No | 61.14% |  | 58.87% |  |  | 0.000 |
| *missing* | 0.00% |  | 0.00% |  |  |  |
| *Responsible for dependent child under age of 16* | |  |  |  | 2.56 |  |
| Yes | 20.70% |  | 11.25% |  |  | 0.366 |
| No | 79.33% |  | 88.83% |  |  | 0.000 |
| *missing* | 0.00% |  | 0.00% |  |  | 0.000 |
| *Care for other household members* |  |  |  |  | 1.76 |  |
| Yes | 3.62% |  | 3.56% |  |  | 0.000 |
| No | 86.96% |  | 86.46% |  |  | 0.000 |
| *missing* | 9.43% |  | 9.98% |  |  | 0.146 |
| *Housing tenure* |  |  |  |  | 1.35 |  |
| Own house outright | 14.74% |  | 24.83% |  |  | 0.000 |
| Own house mortgage | 65.48% |  | 60.82% |  |  | 0.000 |
| Rent | 19.47% |  | 14.01% |  |  | 0.000 |
| *missing* | 0.31% |  | 0.34% |  |  | 0.000 |

Table 3.D: Descriptive statistics (Employees and self-employed)

|  | Employees  (15,285 respondents) |  | Self-employed (2,601 respondents) |  | VIF | | Pearson X2 test | | --- | |
| --- | --- | --- | --- | --- | --- | --- | --- |
| Variables | Percentages |  | Percentages |  |  | self-employed vs  employees  p-val. |
| *Parents background* |  |  |  |  |  |  |
| *Father employment history* |  |  |  |  | 1.38 |  |
| Employee | 69.41% |  | 61.82% |  |  | 0.00 |
| Self-employed | 13.48% |  | 24.77% |  |  | 0.00 |
| *missing* | 17.11% |  | 13.41% |  |  | 0.00 |
| *Mother employment history* |  |  |  |  | 1.15 |  |
| Employee | 47.57% |  | 40.03% |  |  | 0.00 |
| Self-employed | 3.83% |  | 7.25% |  |  | 0.00 |
| *missing* | 48.61% |  | 52.82% |  |  | 0.00 |
| *Father educational qualifications* |  |  |  |  | 3.96 |  |
| University degree | 34.63% |  | 36.50% |  |  | 0.00 |
| Further education | 13.44% |  | 14.07% |  |  | 0.21 |
| *School qualifications* | 20.85% |  | 18.92% |  |  | 0.00 |
| None | 4.85% |  | 5.85% |  |  | 0.00 |
| *missing* | 26.23% |  | 24.66% |  |  | 0.00 |
| *Mother educational qualifications* |  |  |  |  | 4.01 |  |
| University degree | 39.52% |  | 40.57% |  |  | 0.01 |
| Further education | 21.19% |  | 20.78% |  |  | 0.00 |
| *School qualifications* | 12.06% |  | 12.31% |  |  | 0.07 |
| None | 2.95% |  | 2.91% |  |  | 0.40 |
| *missing* | 24.28% |  | 23.43% |  |  | 0.42 |

Table 4.A: Descriptive statistics

|  | Sustained self-employed  (1,146 respondents) |  | Dabbled self-employed  (1,149 respondents) |  | Always employees (9,362 respondents) |  | VIF | | Pearson X2 test | | --- | | | |
| --- | --- | --- | --- | --- | --- | --- | --- | --- | --- | --- | --- |
| Variables | Percentages |  | Percentages |  | Percentages |  |  | Sust vs Dabb  P-val. | Sust vs  Emp  P-val. | Dabb vs Emp  P-val. |
| *Individual Characteristics* |  |  |  |  |  |  |  |  |  |  |
| *Gender* |  |  |  |  |  |  | 1.04 |  |  |  |
| Male | 80.83% |  | 68.45% |  | 51.04% |  |  | 0.000 | 0.000 | 0.000 |
| Female | 19.17% |  | 31.55% |  | 49.06% |  |  | 0.000 | 0.000 | 0.000 |
| *missing* | 0.00% |  | 0.00% |  | 0.00% |  |  |  |  |  |
| *Ethnicity* |  |  |  |  |  |  | 1.12 |  |  |  |
| White | 96.75% |  | 97.23% |  | 97.81% |  |  | 0.000 | 0.000 | 0.461 |
| Non-White | 3.25% |  | 2.77% |  | 2.09% |  |  | 0.900 | 0.000 | 0.000 |
| *missing* | 0.00% |  | 0.01% |  | 0.11% |  |  | 0.000 | 0.000 | 0.000 |
| *Country of Origin* |  |  |  |  |  |  | 1.01 |  |  |  |
| UK | 93.82% |  | 94.49% |  | 95.83% |  |  | 0.281 | 0.000 | 0.000 |
| Non-UK | 6.18% |  | 5.51% |  | 4.27% |  |  | 0.281 | 0.000 | 0.000 |
| *missing* | 0.00% |  | 0.00% |  | 0.00% |  |  |  |  |  |
| *Language* |  |  |  |  |  |  | 1.36 |  |  |  |
| English | 78.78% |  | 90.28% |  | 79.86% |  |  | 0.000 | 0.045 | 0.000 |
| Non-English | 5.00% |  | 2.28% |  | 2.13% |  |  | 0.000 | 0.000 | 0.000 |
| *missing* | 16.22% |  | 7.44% |  | 18.01% |  |  | 0.000 | 0.000 | 0.000 |
| *Age* |  |  |  |  |  |  | 1.34 |  |  |  |
| 16-24 | 2.94% |  | 8.17% |  | 10.76% |  |  | 0.000 | 0.000 | 0.000 |
| 25-39 | 35.35% |  | 47.94% |  | 10.76% |  |  | 0.000 | 0.000 | 0.000 |
| 40-49 | 32.00% |  | 29.82% |  | 45.09% |  |  | 0.365 | 0.000 | 0.000 |
| 50-64 | 27.30% |  | 13.68% |  | 28.34% |  |  | 0.000 | 0.000 | 0.467 |
| 65+ | 2.41% |  | 0.38% |  | 15.24% |  |  | 0.000 | 0.000 | 0.214 |
| *missing* | 0.00% |  | 0.00% |  | 0.57% |  |  |  |  |  |
| *Health status* |  |  |  |  |  |  | 1.16 |  |  |  |
| Good | 80.64% |  | 79.98% |  | 78.78% |  |  | 0.000 | 0.000 | 0.000 |
| Fair | 15.50% |  | 16.43% |  | 16.66% |  |  | 0.000 | 0.002 | 0.000 |
| Poor | 3.79% |  | 3.50% |  | 4.46% |  |  | 0.000 | 0.854 | 0.000 |
| *missing* | 0.07% |  | 0.09% |  | 0.10% |  |  | 0.000 | 0.000 | 0.000 |
| *Disable* |  |  |  |  |  |  | 1.08 |  |  |  |
| Yes | 3.16% |  | 3.93% |  | 4.44% |  |  | 0.000 | 0.000 | 0.000 |
| No | 96.83% |  | 96.17% |  | 95.65% |  |  | 0.000 | 0.000 | 0.000 |
| *missing* | 0.01% |  | 0.00% |  | 0.01% |  |  | 0.000 | 0.000 | 0.001 |
| *Educational Qualifications* |  |  |  |  |  |  | 5.25 |  |  |  |
| Higher degree | 42.61% |  | 52.57% |  | 45.97% |  |  | 0.000 | 0.700 | 0.001 |
| A-levels | 13.28% |  | 12.54% |  | 12.82% |  |  | 0.000 | 0.008 | 0.001 |
| GCSEs | 19.66% |  | 17.55% |  | 21.51% |  |  | 0.000 | 0.387 | 0.001 |
| Other qualifications | 9.08% |  | 7.57% |  | 7.73% |  |  | 0.000 | 0.000 | 0.001 |
| None | 15.21% |  | 9.16% |  | 11.06% |  |  | 0.004 | 0.000 | 0.001 |
| *missing* | 0.16% |  | 0.61% |  | 0.91% |  |  | 0.000 | 0.000 | 0.001 |
| Vocational Qualifications |  |  |  |  |  |  | 1.67 |  |  |  |
| Yes | 44.07% |  | 44.01% |  | 44.28% |  |  | 0.000 | 0.008 | 0.001 |
| No | 55.57% |  | 55.36% |  | 54.73% |  |  | 0.000 | 0.000 | 0.001 |
| missing | 0.36% |  | 0.63% |  | 0.99% |  |  | 0.000 | 0.000 | 0.001 |

Table 4.B: Descriptive statistics

|  | Sustained self-employed  (1,146 respondents) |  | Dabbled self-employed  (1,149 respondents) |  | Always employees (9,362 respondents) |  | VIF | | Pearson X2 test | | --- | | | |
| --- | --- | --- | --- | --- | --- | --- | --- | --- | --- | --- | --- |
| Variables | Percentages |  | Percentages |  | Percentages |  |  | Sust vs Dabb P-val. | Sust vs Emp P-val. | Dabb vs Emp  P-val. |
| *Work Nature* |  |  |  |  |  |  |  |  |  |  |
| *Industry Levels* |  |  |  |  |  |  | 1.31 |  |  |  |
| High skilled | 42.51% |  | 44.30% |  | 32.99% |  |  | 0.000 | 0.000 | 0.001 |
| Medium skilled | 32.51% |  | 32.67% |  | 36.49% |  |  | 0.000 | 0.339 | 0.001 |
| Low skilled | 15.37% |  | 18.06% |  | 21.40% |  |  | 0.000 | 0.000 | 0.001 |
| *missing* | 9.62% |  | 4.97% |  | 9.12% |  |  | 0.000 | 0.000 | 0.001 |
| *Employ staff* |  |  |  |  |  |  | 20.10 |  |  |  |
| Yes | 30.45% |  | 4.06% |  | 0.00% |  |  | 0.000 | 0.000 | 0.001 |
| No | 57.46% |  | 11.43% |  | 0.00% |  |  | 0.000 | 0.000 | 0.001 |
| *missing* | 12.09% |  | 84.51% |  | 100.00% |  |  | 0.000 | 0.000 | 0.001 |
| *nature of self-employment* |  |  |  |  |  |  | 20.01 |  |  |  |
| Own business | 30.83% |  | 4.24% |  | 0.00% |  |  | 0.000 | 0.000 | 0.001 |
| Partner in a business | 12.11% |  | 1.74% |  | 0.00% |  |  | 0.000 | 0.000 | 0.001 |
| Work for self-employed | 33.20% |  | 6.78% |  | 0.00% |  |  | 0.000 | 0.000 | 0.001 |
| Both own and work | 1.61% |  | 0.29% |  | 0.00% |  |  | 0.000 | 0.000 | 0.001 |
| Subcontractor | 5.35% |  | 1.31% |  | 0.00% |  |  | 0.000 | 0.000 | 0.001 |
| Freelancer | 3.20% |  | 0.68% |  | 0.00% |  |  | 0.000 | 0.000 | 0.001 |
| Other | 1.64% |  | 0.45% |  | 0.00% |  |  | 0.000 | 0.000 | 0.001 |
| *missing* | 12.05% |  | 84.50% |  | 100.00% |  |  | 0.000 | 0.000 | 0.001 |
| *Second paid job* |  |  |  |  |  |  | 6.69 |  |  |  |
| Yes | 10.82% |  | 12.91% |  | 7.90% |  |  | 0.000 | 0.000 | 0.001 |
| No | 89.07% |  | 86.87% |  | 92.04% |  |  | 0.000 | 0.022 | 0.001 |
| *missing* | 0.11% |  | 0.21% |  | 0.06% |  |  | 0.000 | 0.000 | 0.001 |
| *Work satisfaction* |  |  |  |  |  |  | 1.75 |  |  |  |
| dissatisfied | 6.72% |  | 10.18% |  | 10.39% |  |  | 0.000 | 0.000 | 0.001 |
| neither | 5.52% |  | 7.65% |  | 7.49% |  |  | 0.000 | 0.000 | 0.001 |
| satisfied | 87.65% |  | 82.07% |  | 82.05% |  |  | 0.000 | 0.000 | 0.001 |
| *missing* | 0.12% |  | 0.10% |  | 0.07% |  |  | 0.000 | 0.014 | 0.001 |

Table 4.C: Descriptive statistics

|  | Sustained self-employed  (1,146 respondents) |  | Dabbled self-employed  (1,149 respondents) |  | Always employees (9,362 respondents) |  | VIF | | Pearson X2 test | | --- | | | |
| --- | --- | --- | --- | --- | --- | --- | --- | --- | --- | --- | --- |
| Variables | Percentages |  | Percentages |  | Percentages |  |  | Sust vs Dabb P-val. | Sust vs Emp P-val. | Dabb vs Emp P-val. |
| *Household Characteristics* |  |  |  |  |  |  |  |  |  |  |
| *Married /Cohabiting* |  |  |  |  |  |  | 1.73 |  |  |  |
| Yes | 81.45% |  | 79.54% |  | 74.73% |  |  | 0.000 | 0.000 | 0.000 |
| No | 18.31% |  | 20.42% |  | 24.72% |  |  | 0.000 | 0.000 | 0.000 |
| *missing* | 0.14% |  | 0.04% |  | 0.55% |  |  | 0.000 | 0.000 | 0.000 |
| *Spouse/Partner employed* |  |  |  |  |  |  | 1.72 |  |  |  |
| Yes | 61.85% |  | 65.82% |  | 64.79% |  |  | 0.000 | 0.000 | 0.000 |
| No | 18.90% |  | 13.62% |  | 10.27% |  |  | 0.000 | 0.000 | 0.000 |
| *missing* | 18.35% |  | 20.56% |  | 24.94% |  |  | 0.000 | 0.000 | 0.000 |
| *Has Children* |  |  |  |  |  |  | 1.22 |  |  |  |
| Yes | 43.49% |  | 47.83% |  | 40.93% |  |  | 0.000 | 0.000 | 0.000 |
| No | 56.51% |  | 52.17% |  | 59.17% |  |  | 0.000 | 0.000 | 0.000 |
| *missing* | 0.00% |  | 0.00% |  | 0.00% |  |  |  |  |  |
| *Responsible for dependent child under age of 16* | |  |  |  |  |  | 1.09 |  |  |  |
| Yes | 8.91% |  | 15.93% |  | 20.24% |  |  | 0.000 | 0.677 | 0.000 |
| No | 91.09% |  | 84.07% |  | 79.76% |  |  | 0.000 | 0.000 | 0.000 |
| *missing* | 0.00% |  | 0.00% |  | 0.00% |  |  | 0.000 | 0.000 | 0.000 |
| *Care for other household members* |  |  |  |  |  |  | 1.84 |  |  |  |
| Yes | 3.03% |  | 2.47% |  | 3.22% |  |  | 0.000 | 0.000 | 0.000 |
| No | 86.13% |  | 88.89% |  | 87.71% |  |  | 0.000 | 0.000 | 0.000 |
| *missing* | 10.84% |  | 8.64% |  | 9.07% |  |  | 0.000 | 0.000 | 0.000 |
| *Housing tenure* |  |  |  |  |  |  | 1.35 |  |  |  |
| Own house outright | 23.04% |  | 10.60% |  | 11.57% |  |  | 0.000 | 0.000 | 0.000 |
| Own house mortgage | 62.65% |  | 74.90% |  | 69.62% |  |  | 0.000 | 0.000 | 0.000 |
| Rent | 13.95% |  | 14.28% |  | 18.48% |  |  | 0.000 | 0.000 | 0.000 |
| *missing* | 0.36% |  | 0.22% |  | 0.33% |  |  | 0.000 | 0.000 | 0.000 |

Table 4.D: Descriptive statistics

|  | Sustained self-employed  (1,146 respondents) |  | Dabbled self-employed  (1,149 respondents) |  | Always employees (9,362 respondents) |  | VIF | | Pearson X2 test | | --- | | | |
| --- | --- | --- | --- | --- | --- | --- | --- | --- | --- | --- | --- |
| Variables | Percentages |  | Percentages |  | Percentages |  |  | Sust vs Dabb P-val. | Sust vs Emp P-val. | Dabb vs Emp P-val. |
| *Parents background* |  |  |  |  |  |  |  |  |  |  |
| *Father employment history* |  |  |  |  |  |  | 1.22 |  |  |  |
| Employee | 59.87% |  | 66.64% |  | 69.90% |  |  | 0.000 | 0.000 | 0.000 |
| Self-employed | 26.68% |  | 18.20% |  | 13.33% |  |  | 0.000 | 0.000 | 0.000 |
| *missing* | 13.45% |  | 15.16% |  | 16.77% |  |  | 0.901 | 0.000 | 0.000 |
| *Mother employment history* |  |  |  |  |  |  | 1.11 |  |  |  |
| Employee | 40.42% |  | 47.80% |  | 50.10% |  |  | 0.000 | 0.000 | 0.001 |
| Self-employed | 7.28% |  | 6.55% |  | 3.56% |  |  | 0.000 | 0.000 | 0.001 |
| *missing* | 52.30% |  | 45.65% |  | 46.34% |  |  | 0.000 | 0.000 | 0.001 |
| *Father educational qualifications* |  |  |  |  |  |  | 4.42 |  |  |  |
| University degree | 33.62% |  | 31.60% |  | 30.77% |  |  | 0.000 | 0.000 | 0.000 |
| Further education | 14.07% |  | 16.27% |  | 13.03% |  |  | 0.000 | 0.000 | 0.000 |
| *School qualifications* | 18.47% |  | 26.30% |  | 19.34% |  |  | 0.000 | 0.001 | 0.000 |
| None | 6.66% |  | 6.07% |  | 4.44% |  |  | 0.000 | 0.000 | 0.000 |
| *missing* | 27.19% |  | 19.77% |  | 32.43% |  |  | 0.000 | 0.000 | 0.000 |
| *Mother educational qualifications* |  |  |  |  |  |  | 4.49 |  |  |  |
| University degree | 35.30% |  | 37.81% |  | 34.42% |  |  | 0.000 | 0.000 | 0.000 |
| Further education | 21.74% |  | 27.03% |  | 21.36% |  |  | 0.000 | 0.036 | 0.000 |
| *School qualifications* | 12.56% |  | 15.26% |  | 10.88% |  |  | 0.000 | 0.000 | 0.000 |
| None | 3.11% |  | 2.80% |  | 3.04% |  |  | 0.000 | 0.079 | 0.000 |
| *missing* | 27.29% |  | 17.10% |  | 30.30% |  |  | 0.000 | 0.000 | 0.000 |
